# Supplementary material for: Breastmilk Cell and Fat Contents Respond Similarly to Removal of Breastmilk by the Infant
Source: PubMed Central journal article supplement (PMC3819380; doi:10.1371/journal.pone.0078232), 2013-11-06
Supplement: pone.0078232.s001.pdf [file pone.0078232.s001.pdf]

## SUPPORTING INFORMATION

**Breastmilk cell and fat contents respond similarly to removal of breastmilk by the infant**

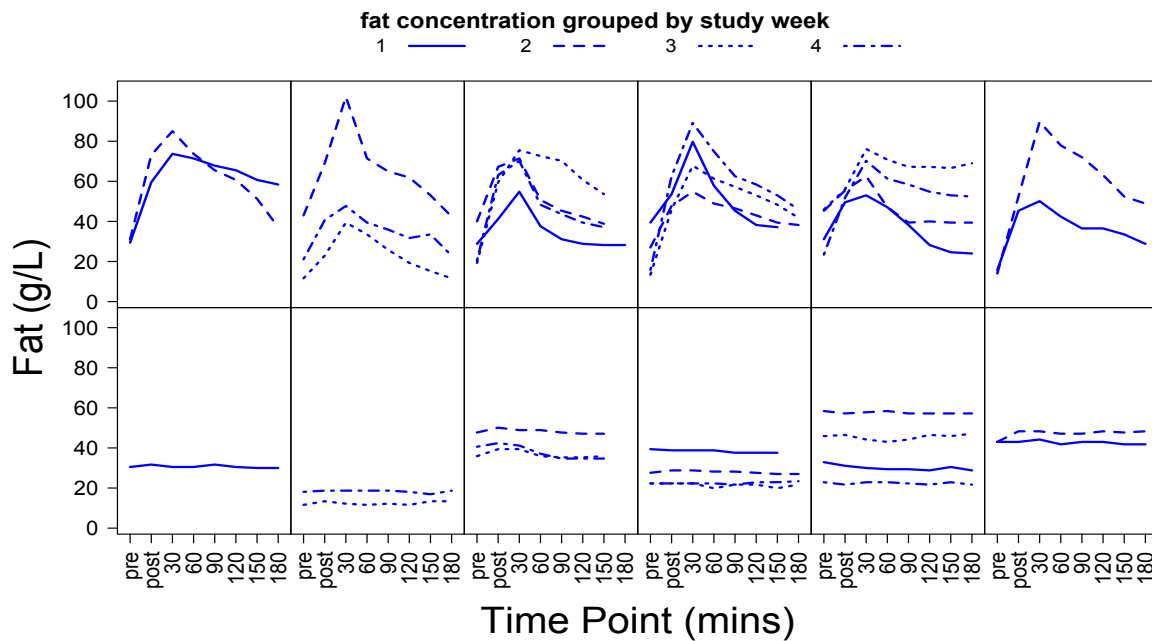

**Figure S1.** Inter- and intra-individual variation in breastmilk fat content by study week. The top row shows the feeding breast, whereas the bottom row shows the non-feeding (control) breast. Each repeat/week is indicated with a different line pattern (week one – solid line; week two ‘---’, week three ‘....’, week four ‘-.-.-’). Each column represents one participant (N=6). Pre: sample collected immediately pre-feeding; post: sample collected immediately post-feeding.

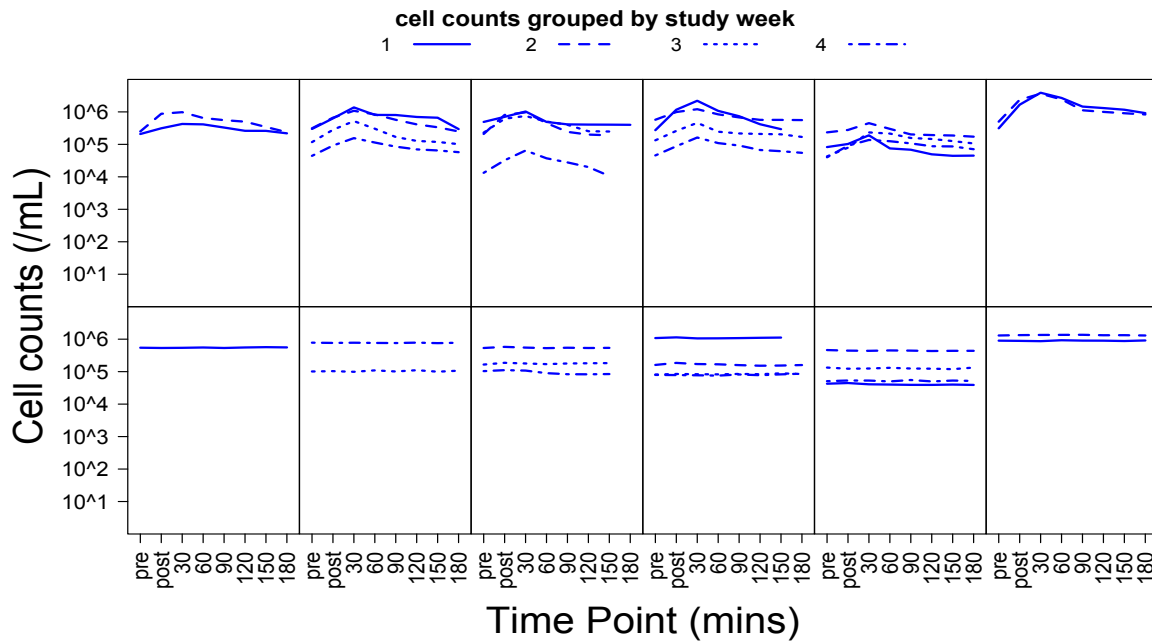

**Figure S2.** Inter- and intra-individual variation in breastmilk cell content (counts/mL milk) by study week. The top row shows the feeding breast, whereas the bottom row shows the non-feeding (control) breast. Each repeat/week is indicated with a different line pattern (week one – solid line; week two ‘---’, week three ‘....’, week four ‘-.-.-’). Each column represents one participant (N=6). Pre: sample collected immediately pre-feeding; post: sample collected immediately post-feeding.

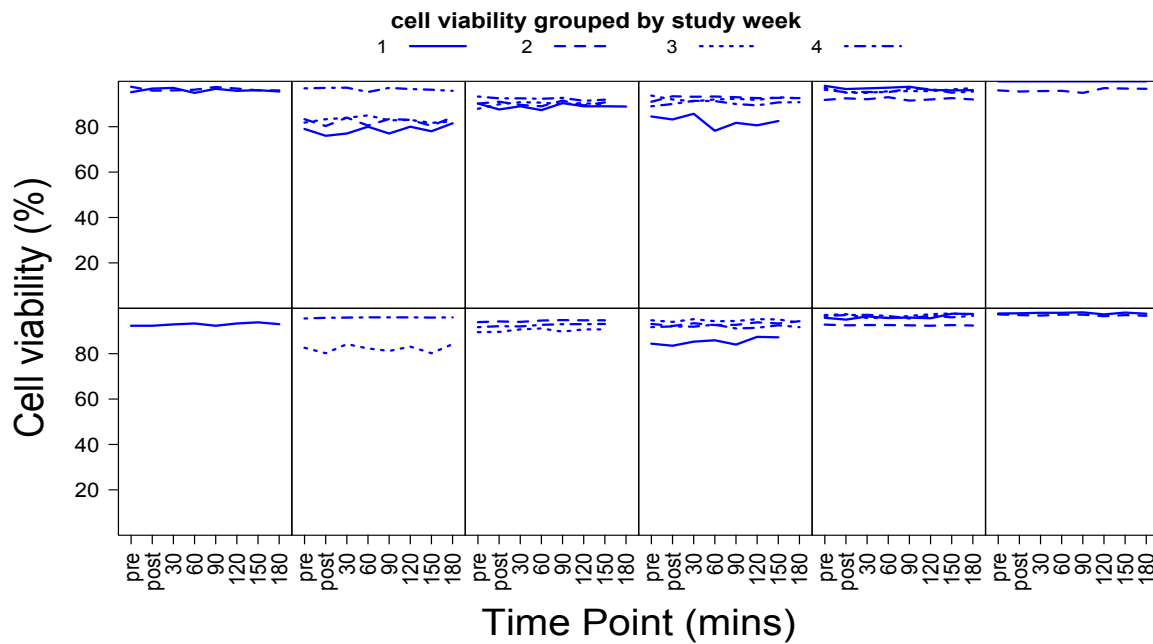

**Figure S3.** Inter- and intra-individual variation in breastmilk cell viability (%) by study week. The top row shows the feeding breast, whereas the bottom row shows the non-feeding (control) breast. Each repeat/week is indicated with a different line pattern (week one – solid line; week two ‘---’, week three ‘...’, week four ‘-.-.-’). Each column represents one participant (N=6). Pre: sample collected immediately pre-feeding; post: sample collected immediately post-feeding.

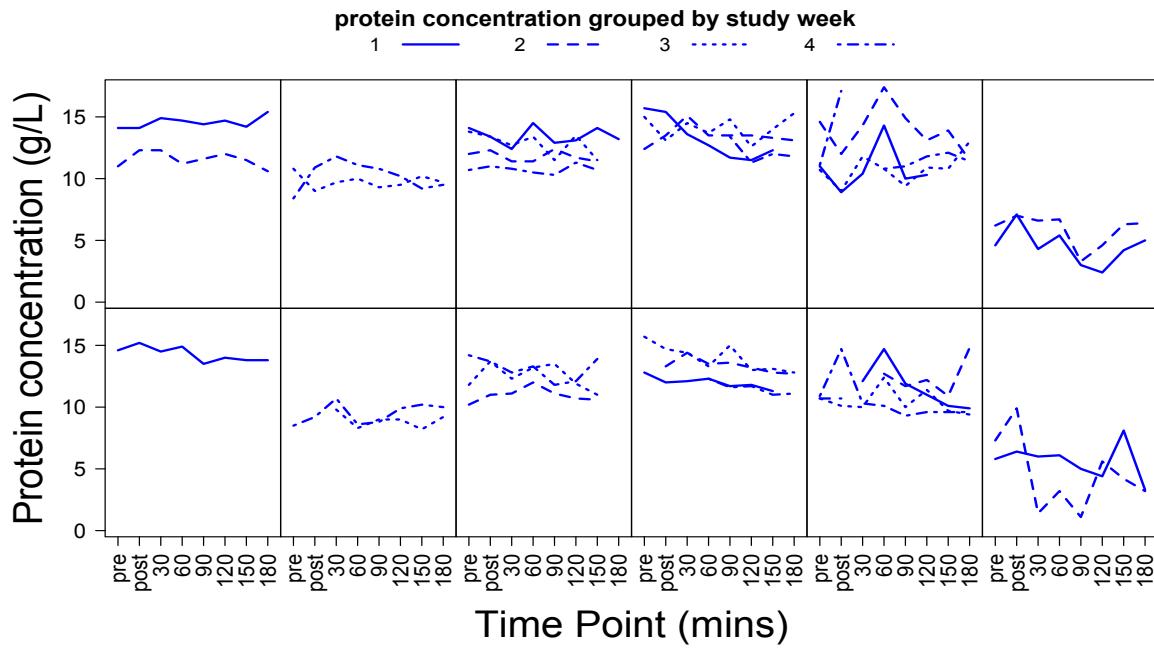

**Figure S4.** Inter- and intra-individual variation in breastmilk protein concentration (g/L) by study week. The top row shows the feeding breast, whereas the bottom row shows the non-feeding (control) breast. Each repeat/week is indicated with a different line pattern (week one – solid line; week two ‘- - -’, week three ‘. . .’, week four ‘- . - .’). Each column represents one participant (N=6). Pre: sample collected immediately pre-feeding; post: sample collected immediately post-feeding.

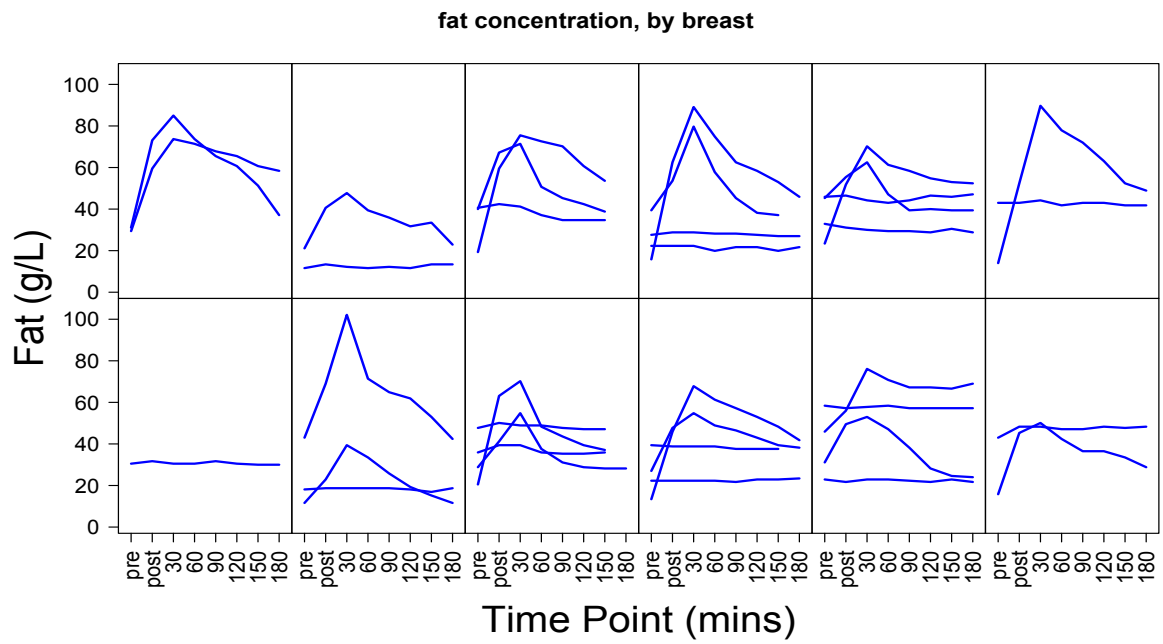

**Figure S5.** Inter- and intra-individual variation in breastmilk fat content by breast type. The top row shows the right breast, whereas the bottom row shows the left breast. Each column represents one participant (N=6). Pre: sample collected immediately pre-feeding; post: sample collected immediately post-feeding.

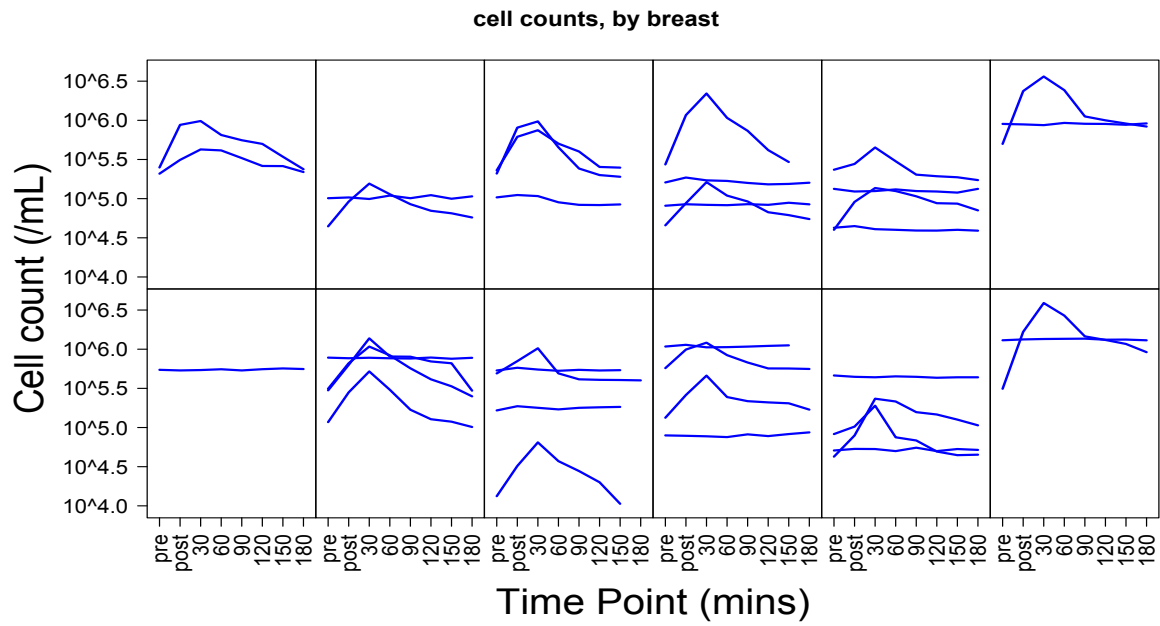

**Figure S6.** Inter- and intra-individual variation in breastmilk cell content (counts/mL milk) by breast type. The top row shows the right breast, whereas the bottom row shows the left breast. Each column represents one participant (N=6). Pre: sample collected immediately pre-feeding; post: sample collected immediately post-feeding.

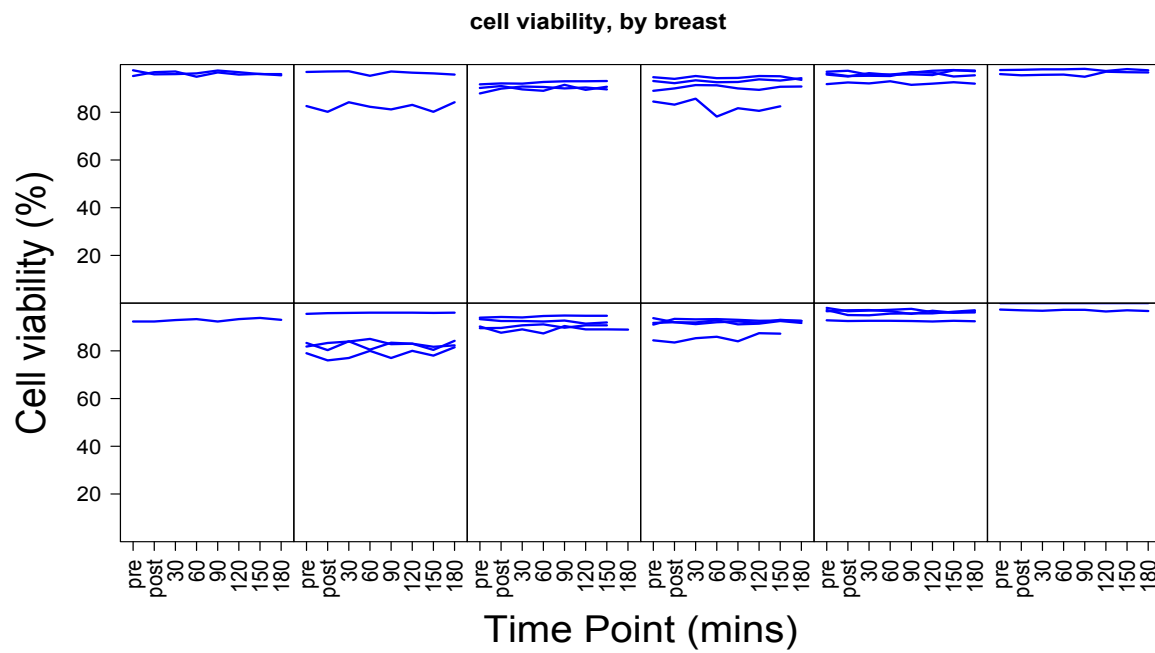

**Figure S7.** Inter- and intra-individual variation in breastmilk cell viability (%) by breast type. The top row shows the right breast, whereas the bottom row shows the left breast. Each column represents one participant (N=6). Pre: sample collected immediately pre-feeding; post: sample collected immediately post-feeding.

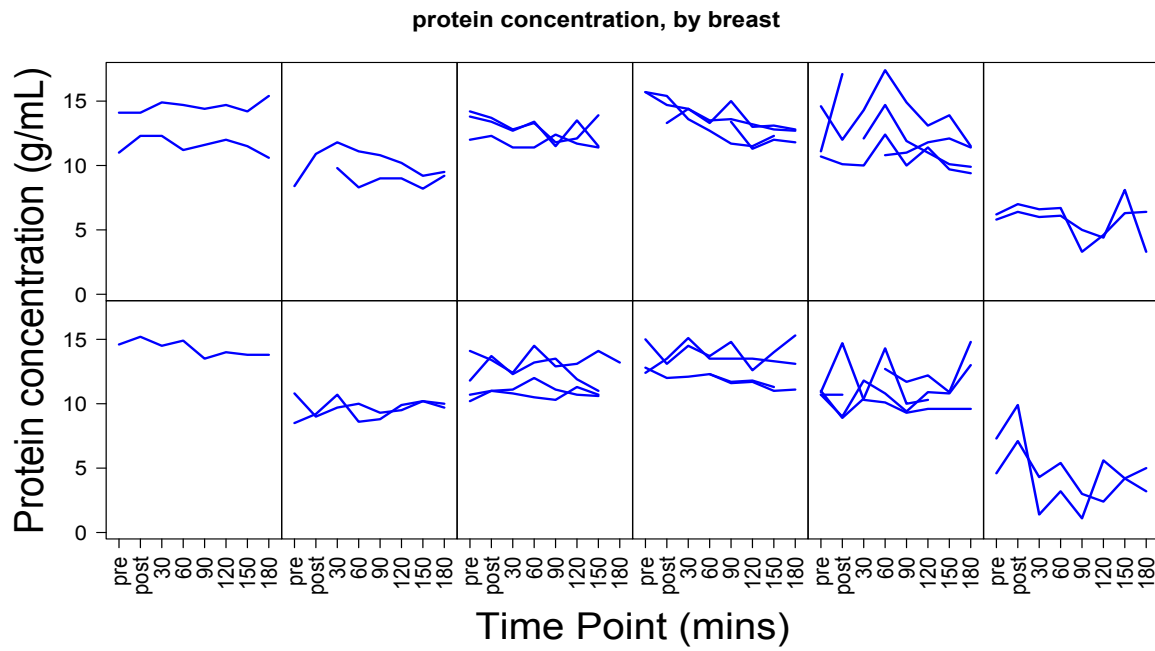

**Figure S8.** Inter- and intra-individual variation in breastmilk protein content (g/L) by breast type. The top row shows the right breast, whereas the bottom row shows the left breast. Each column represents one participant (N=6). Pre: sample collected immediately pre-feeding; post: sample collected immediately post-feeding.



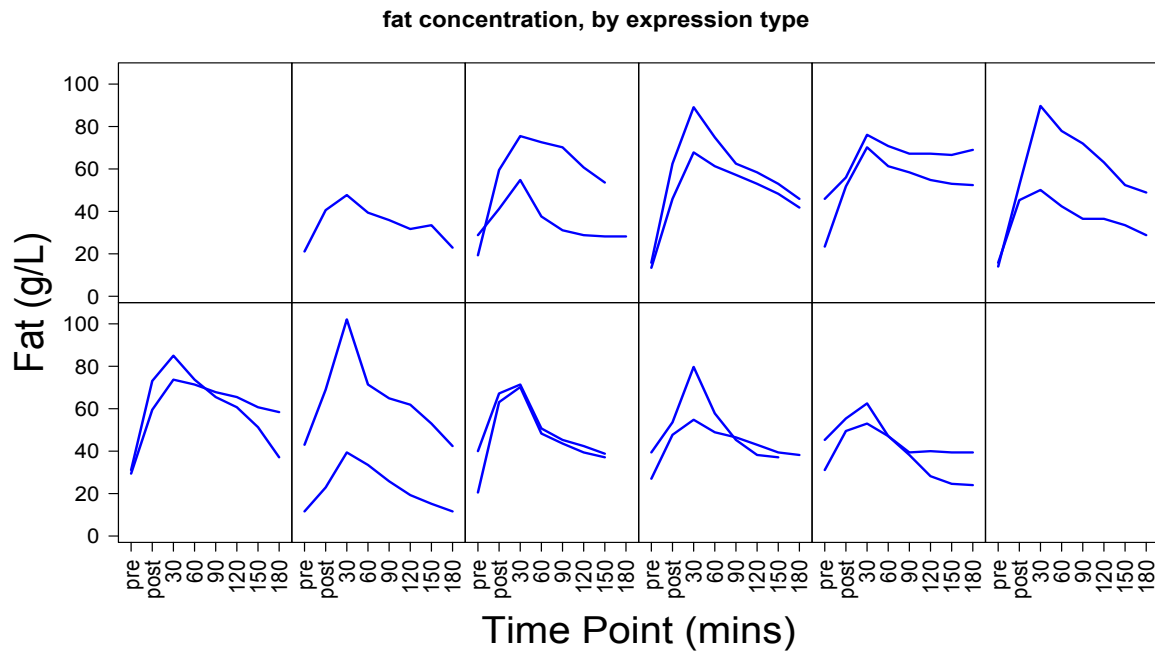

**Figure S9.** Inter- and intra-individual variation in breastmilk fat content by expression type. The top row shows the pump expressions, whereas the bottom row shows the hand expressions. Each column represents one participant (N=6). Pre: sample collected immediately pre-feeding; post: sample collected immediately post-feeding.

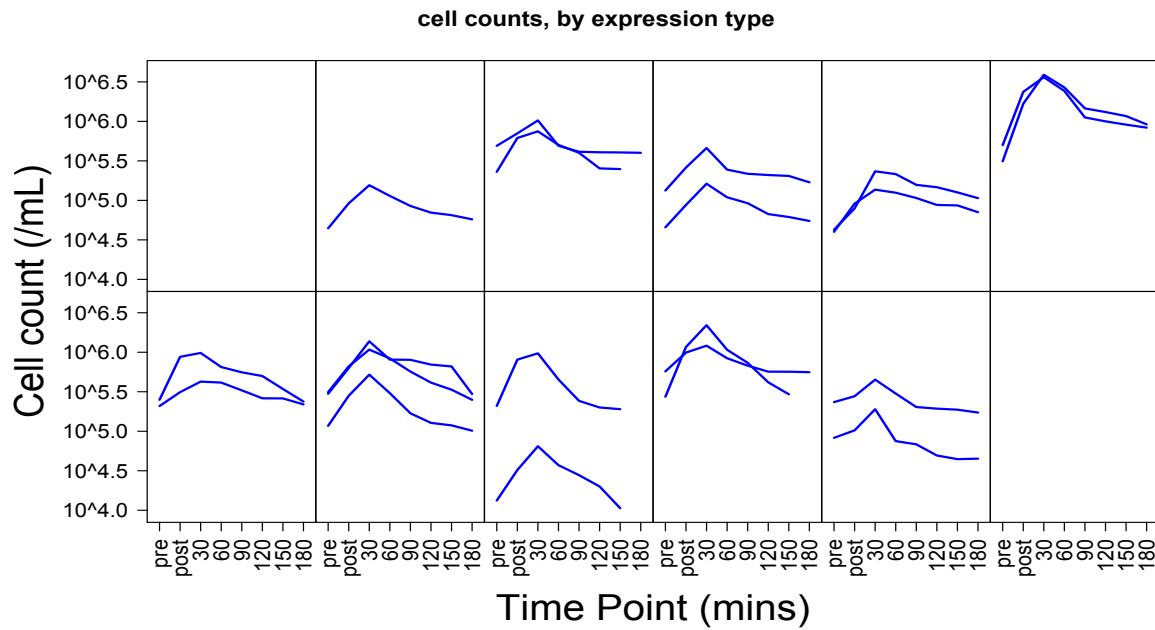

**Figure S10.** Inter- and intra-individual variation in breastmilk cell content (counts/mL milk) by expression type. The top row shows the pump expressions, whereas the bottom row shows the hand expressions. Each column represents one participant (N=6). Pre: sample collected immediately pre-feeding; post: sample collected immediately post-feeding.

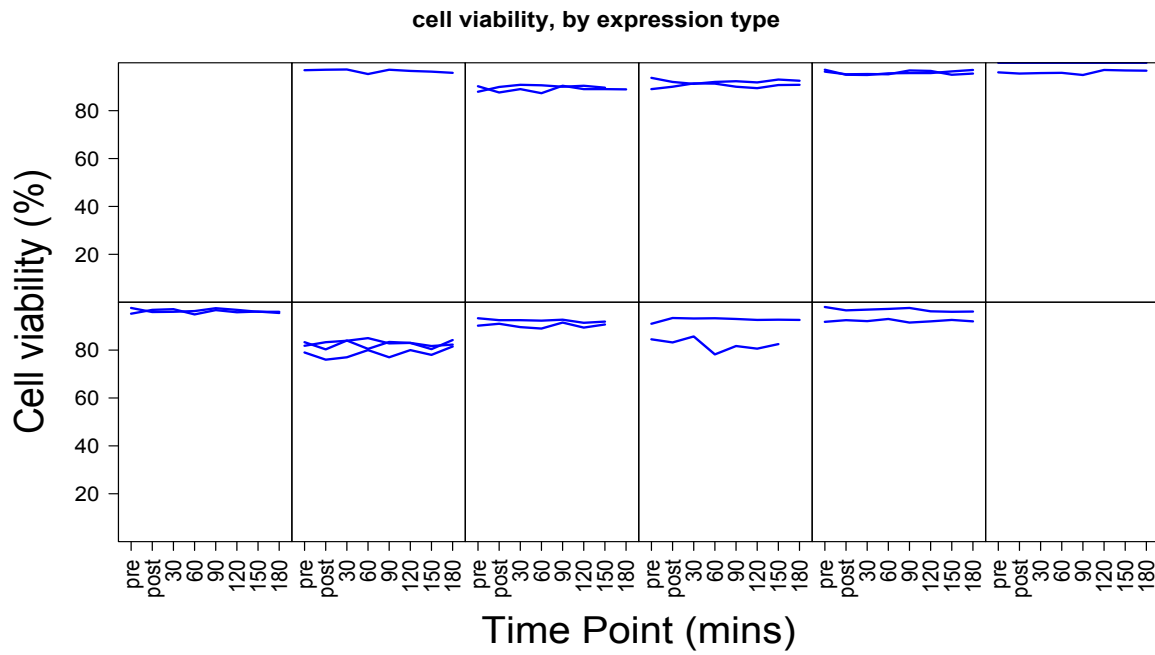

**Figure S11.** Inter- and intra-individual variation in breastmilk cell viability (%) by expression type. The top row shows the pump expressions, whereas the bottom row shows the hand expressions. Each column represents one participant (N=6). Pre: sample collected immediately pre-feeding; post: sample collected immediately post-feeding.

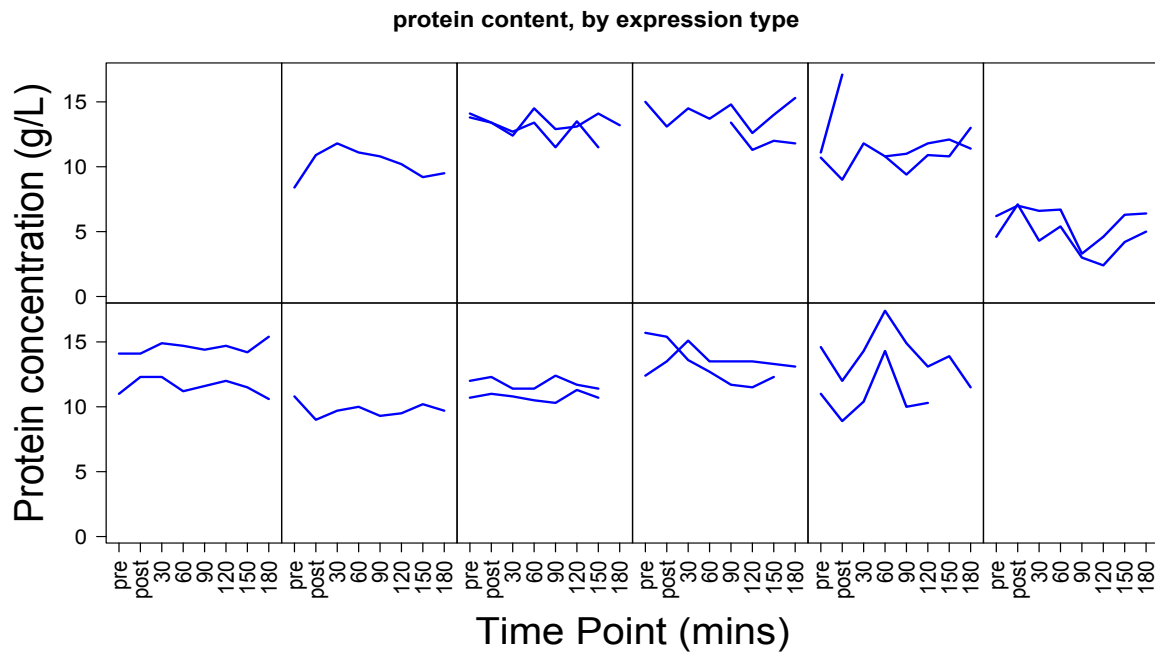

**Figure S12.** Inter- and intra-individual variation in breastmilk protein content (g/L) by expression type. The top row shows the pump expressions, whereas the bottom row shows the hand expressions. Each column represents one participant (N=6). Pre: sample collected immediately pre-feeding; post: sample collected immediately post-feeding.
